# Supplementary material
Source: PubMed Central journal article supplement (PMC6446192)
Supplement: EMBR-20-e46293-s001.pdf [file EMBR-20-e46293-s001.pdf]

# Appendix

## Appendix Figures and Figure Legends

## Appendix Tables

### Table of contents:

|                                                                                 |   |
|---------------------------------------------------------------------------------|---|
| Appendix Figure S1. eCDNs induces IL-6 production in macrophages .....          | 2 |
| Appendix Figure S2. Internalization of eCDNs.....                               | 3 |
| Appendix Figure S3. eCDNs-induced innate immune activation requires STING ..... | 4 |
| Appendix Figure S4. Cellular compartmentalization of eCDNs puncta.....          | 5 |
| Appendix Figure S5. Diagram showing involvement of cGAS in sensing of eCDNs ..  | 6 |
| Appendix Table S1. SAXS Data collection and derived parameters.....             | 7 |

## Appendix Figures and Figure Legends

Appendix Figure S1

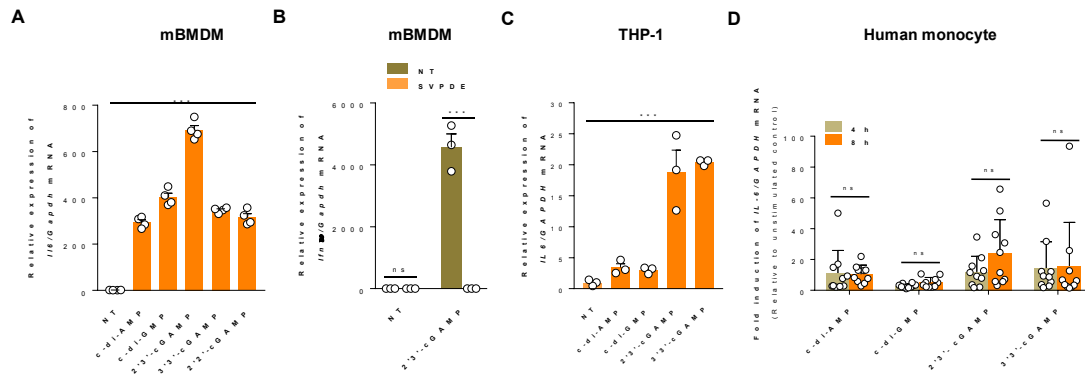

### Appendix Figure S1. eCDNs induces IL-6 production in macrophages.

**A** qRT-PCR detection of IL-6 mRNA in mBMDMs stimulated with indicated eCDNs (5  $\mu$ g/ml) for 4 h.

**B** qRT-PCR detection of IFN $\beta$  mRNA in mBMDMs stimulated with indicated ecGMAP (5  $\mu$ g/ml) left pretreated or untreated with snake venom phosphodiesterase (SVPDE) for 4 h.

**C** qRT-PCR detection of IL-6 mRNA in THP-1 cells stimulated with indicated eCDNs (5  $\mu$ g/ml) for 4 h.

**D** qRT-PCR detection of IL-6 mRNA in human PBMC-derived monocytes stimulated with indicated eCDNs (5  $\mu$ g/ml) for 4 h or 8 h, respectively.

Data (A-C) are means+SD averaged from at least 3 independent experiments performed with biological triplicate and each symbol represents the mean of biological triplicates. Data in (D) are means+SD of 10 healthy donors, where each symbol represents one individual donor. One-way ANOVA followed by Dunnett's post hoc test (A, C) and Two-way ANOVA followed by Bonferroni's post hoc test (B, D) were used for statistical analysis, respectively. \*\*\*,  $p < 0.001$ ; ns, not significant.

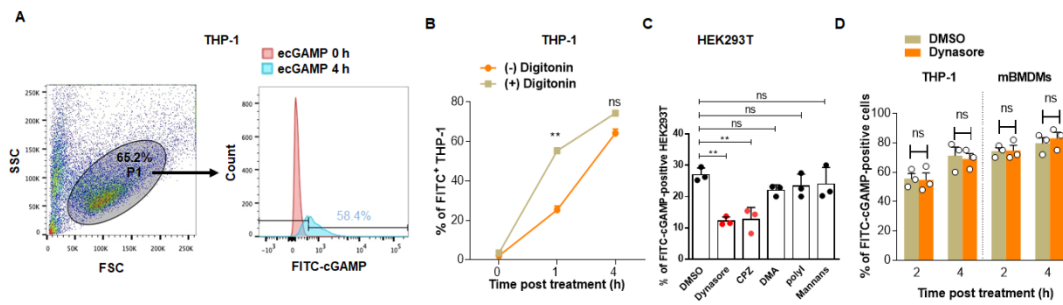

## Appendix Figure S2. Internalization of eCDNs.

**A** Gating strategy for the FACS analysis of FITC<sup>+</sup> THP-1 cells. The live THP-1 cells were gated as P1. The frequency of FITC<sup>+</sup> THP-1 cells were calculated based on the control of unstimulated cells as shown on the right panel.

**B** Frequencies of FITC<sup>+</sup>THP-1 cells stimulated with FITC-cGAMP (5  $\mu$ g/ml) for indicated times in absence (-) or presence (+) of digitonin (10  $\mu$ g/ml). Data are means+SD averaged from of 3 independent experiments performed with biological triplicates. Two-way ANOVA followed by Bonferroni's post hoc test was used for statistical analysis. \*\* $p$ <0.01; ns, not significant.

**C** Frequencies of FITC<sup>+</sup> HEK293T cells stimulated with FITC-cGAMP for 1 h in presence of DMSO or indicated inhibitors including Dynasore (10  $\mu$ M), chlorpromazine (CPZ, 10  $\mu$ M), dimethylamiloride (DMA, 100  $\mu$ M), polyinosinic acid (Poly I, 50  $\mu$ g/ml) or mannans from *Sacharomyces cerevesiae* (Mannans, 1 mg/ml). Data are mean+SD and averaged from of 3 independent experiments performed with biological triplicates and each symbol represents the mean of biological triplicates. One-way ANOVA followed by Dunnett's post hoc test was used for statistical analysis, \*\* $p$ <0.01; ns, not significant.

**D** Frequencies of FITC<sup>+</sup>THP-1 cells or mBMDMs stimulated with FITC-icGAMP (0.1  $\mu$ g/ml) for 4 h in the presence of DMSO or dynasore (10  $\mu$ M). Data are means+SD averaged from of 3 independent experiments performed with biological triplicates. Two-way ANOVA followed by Bonferroni's post hoc test was used for statistical analysis. ns, not significant.

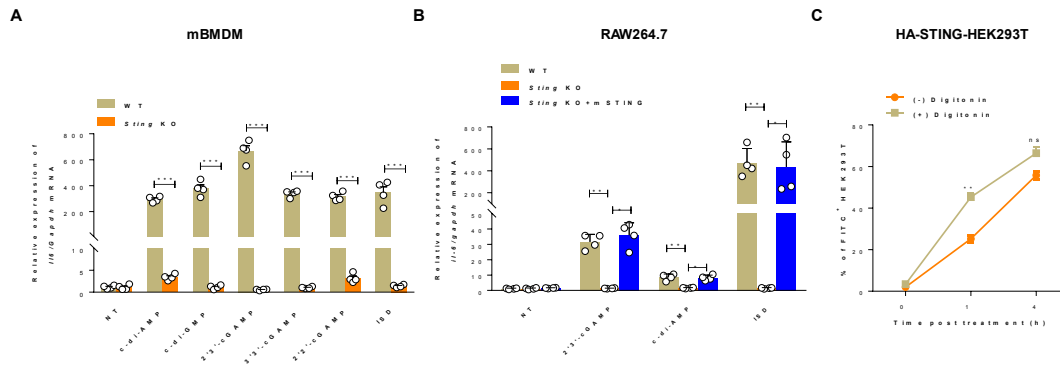

### Appendix Figure S3. eCDNs-induced innate immune activation requires STING.

**A** qRT-PCR detection of IL-6 mRNA in WT and *sting*<sup>-/-</sup> mBMDMs stimulated with indicated eCDNs (5  $\mu$ g/ml).

**B** qRT-PCR detection of IL-6 mRNA in WT, STING KO or STING KO complemented with mSTING (STING KO+mSTING) RAW264.7 cells stimulated with indicated eCDNs (5  $\mu$ g/ml) or transfected with IFN stimulatory DNA (ISD).

**C** Frequencies of FITC<sup>+</sup> HA-STING-HEK293T cells stimulated with FITC-cGAMP (5  $\mu$ g/ml) for indicated times in the absence (-) or presence (+) of digitonin.

Data (**A-B**) are means+SD averaged from 4 independent experiments performed with biological triplicates, where each symbol represents the mean of biological triplicates. Data (**C**) are means $\pm$ SD averaged from 3 independent experiments performed with biological triplicates. Two-way ANOVA followed by Bonferroni's post hoc test was used for statistical analysis. \*,  $p < 0.05$ ; \*\*,  $p < 0.01$ ; \*\*\*,  $p < 0.001$ .

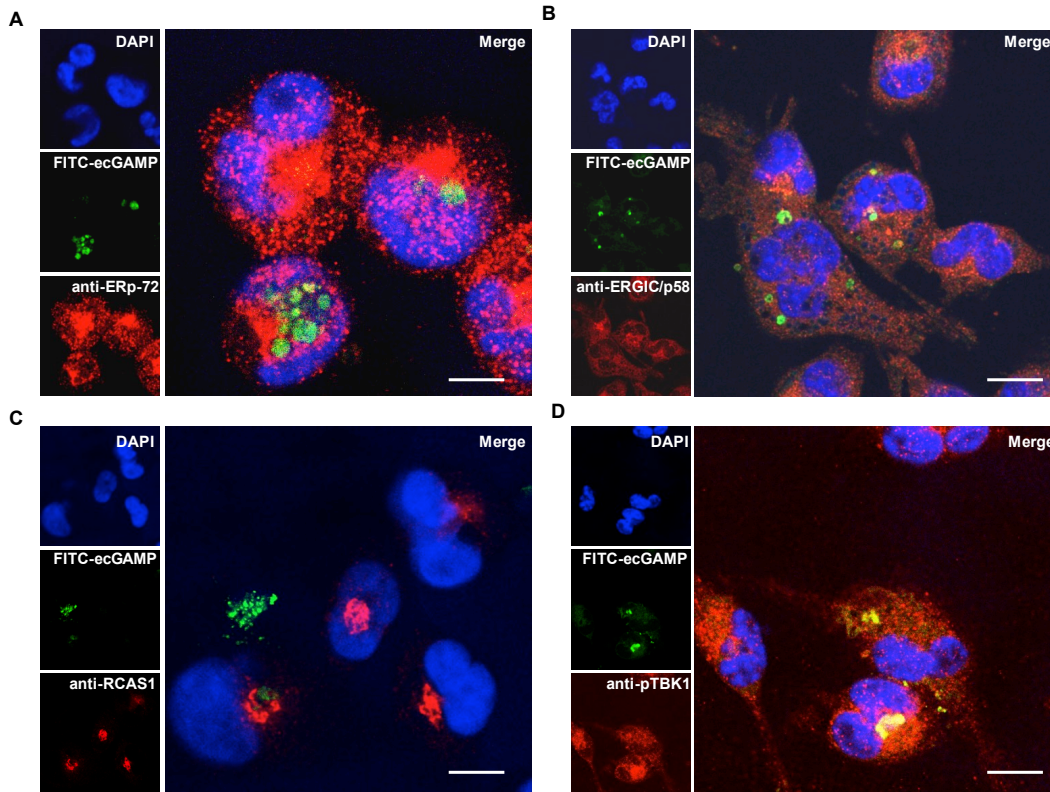

**Appendix Figure S4. Cellular compartmentalization of eCDNs puncta.**

Immunostaining of ER (anti-ERp-72, red) (A), ERGIC (anti-ERGIC/p58, red) (B), Golgi (anti-RCAS1, red) (C) and phospho-TBK1 (anti-phospho-TBK1, red) (D) in THP-1 cells stimulated with FITC-ecGAMP (5  $\mu\text{g/ml}$ , green) for 2 h, nucleus in blue (DAPI). Data are representative of at least 3 independent experiments. Scale bar, 10  $\mu\text{m}$ .

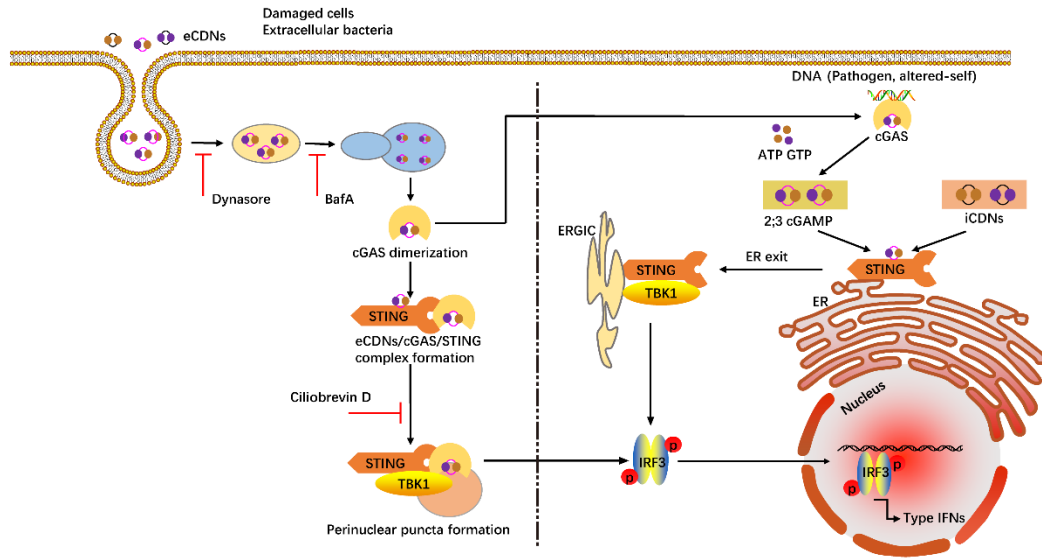

**Appendix Figure S5. Diagram showing involvement of cGAS in sensing of eCDNs.** The right panel depicts the DNA recognition by cGAS and the downstream events leading to type I IFN release. The left panel summarizes mechanisms governing eCDN sensing as indicated by current data. Clathrin-dependent endocytosis and endosome maturation are critical for sensing of eCDNs. Internalized CDNs bind cGAS directly, leading to its dimerization and promoting the formation of cGAS/STING complex. cGAS thus serves as a scaffolding protein and nucleates the formation of perinuclear signalosomes encompassing eCDNs/cGAS/STING which enables STING activation. Interestingly, eCDNs-induced dimerization of cGAS facilitates DNA sensing by cGAS.

**Appendix Table S1. SAXS Data collection and derived parameters**

| Data collection parameters                     | cGAS                                                 | cGAS with<br>2'3'-cGAMP |
|------------------------------------------------|------------------------------------------------------|-------------------------|
| Instrument                                     | P12 at EMBL/DESY, storage ring PETRA III,<br>Germany |                         |
| Beam geometry                                  | 0.2 × 0.12 mm <sup>2</sup>                           |                         |
| Wavelength (Å)                                 | 1.24                                                 |                         |
| s-range (Å <sup>-1</sup> )                     | 0.002 – 0.47                                         |                         |
| Exposure time (s)                              | 3600 × 1                                             |                         |
| Temperature (K)                                | 283                                                  |                         |
| Structural parameters                          |                                                      |                         |
| I(0) (arbitrary units)                         | 2237.0 ± 22.4                                        | 2559.0 ± 25.6           |
| (from P(r))                                    |                                                      |                         |
| R <sub>g</sub> (from P(r)) (Å)                 | 33.8 ± 1.7                                           | 41.2 ± 2.1              |
| I(0) (arbitrary units)                         | 2166.9 ± 18.2                                        | 2543.39 ± 10.14         |
| (from Guinier)                                 |                                                      |                         |
| R <sub>g</sub> (Å) (from Guinier)              | 31.4 ± 1.4                                           | 39.4 ± 0.9              |
| D <sub>max</sub> (Å)                           | 127.0 ± 6.0                                          | 141.1 ± 7.1             |
| Porod volume (10 <sup>3</sup> Å <sup>3</sup> ) | 110.13                                               | 126.9                   |
| Ab initio model resolution (Å)                 | 29 ± 2                                               | 25 ± 2                  |

Molecular mass determination

|                                                |                            |                    |
|------------------------------------------------|----------------------------|--------------------|
| MMPOROD<br>(from Porod volume) (kDa)           | $64.7 \pm 6.5$             | $74.7 \pm 13$      |
| MMDAM<br>(from bead model, kDa)                | $77 \pm 10$                | $98 \pm 15$        |
| Calculated monomeric MM<br>from sequence (kDa) | 58.8                       | 58.8               |
| Software employed                              |                            |                    |
| Primary data reduction                         | Automated radial averaging |                    |
| Data processing                                | PRIMUS                     |                    |
| Ab initio analysis                             | DAMMIF                     | DAMMIF             |
| Validation and averaging                       | SASRES, DAMAVER            | SASRES,<br>DAMAVER |
| Modelling and flexibility<br>analysis          | EOM                        | EOM                |
