# Supplementary material
Source: PubMed Central journal article supplement (PMC6446192)

Figure 7D

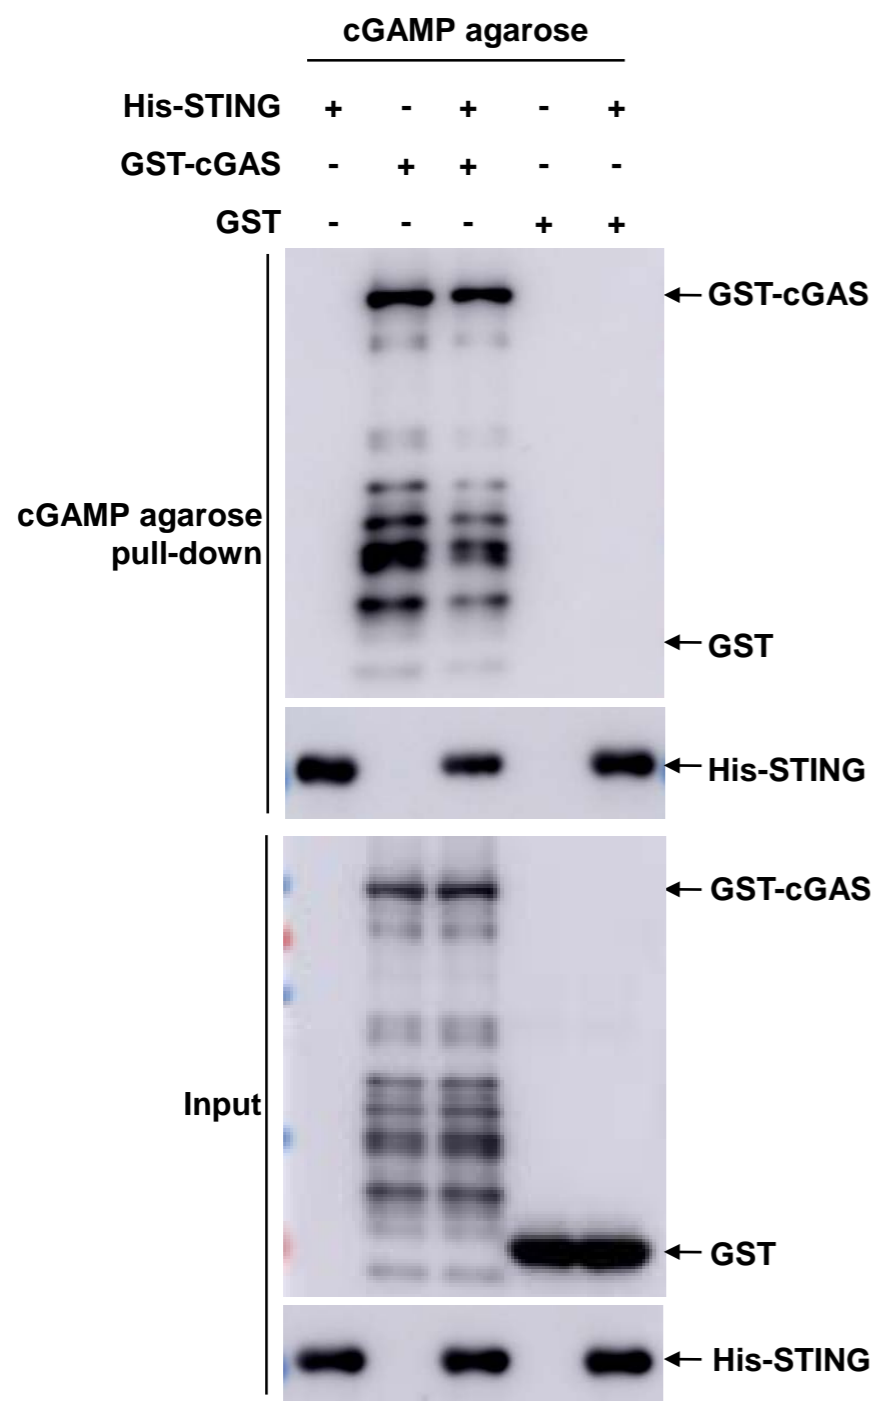

Figure 7D Source Data

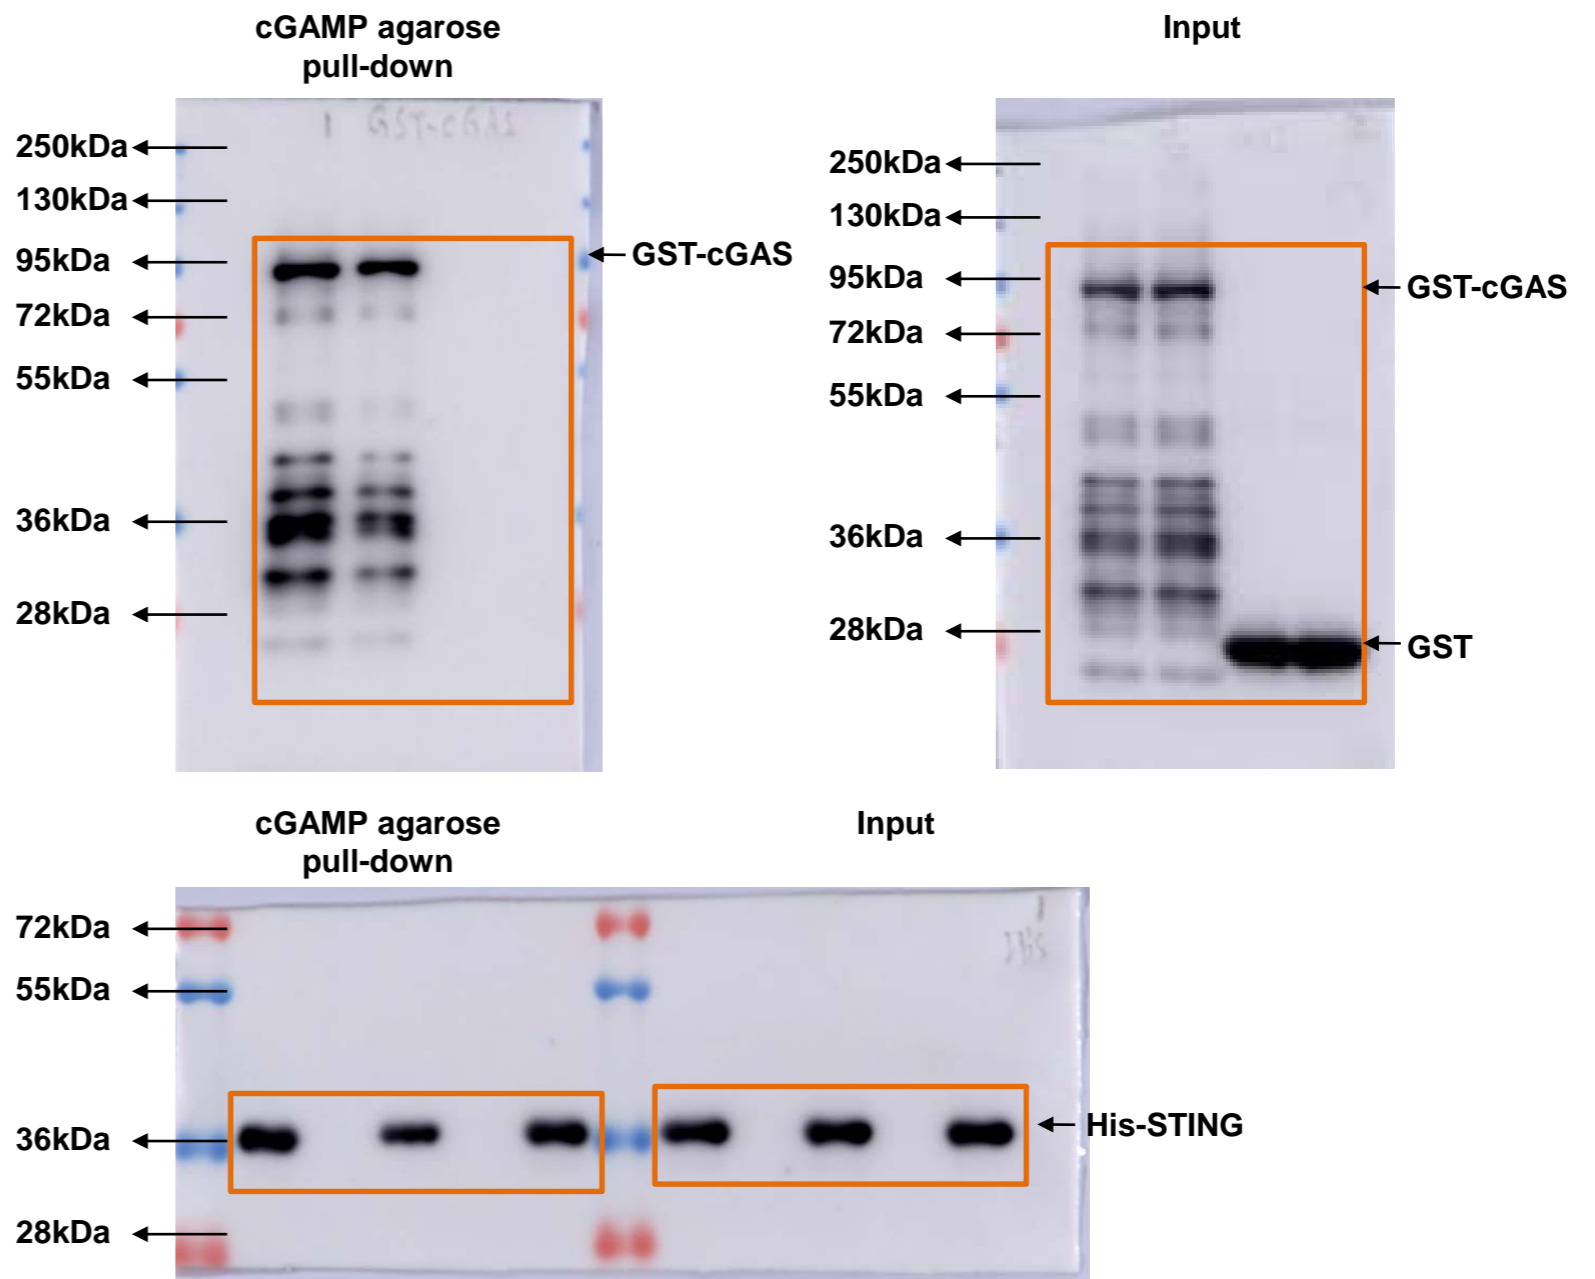

Figure 7E

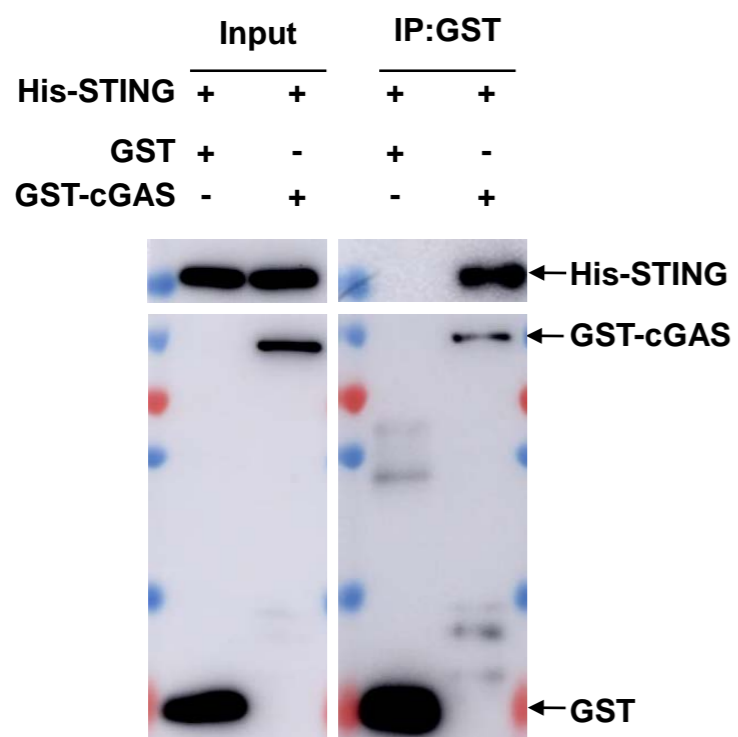

Figure 7E Source Data

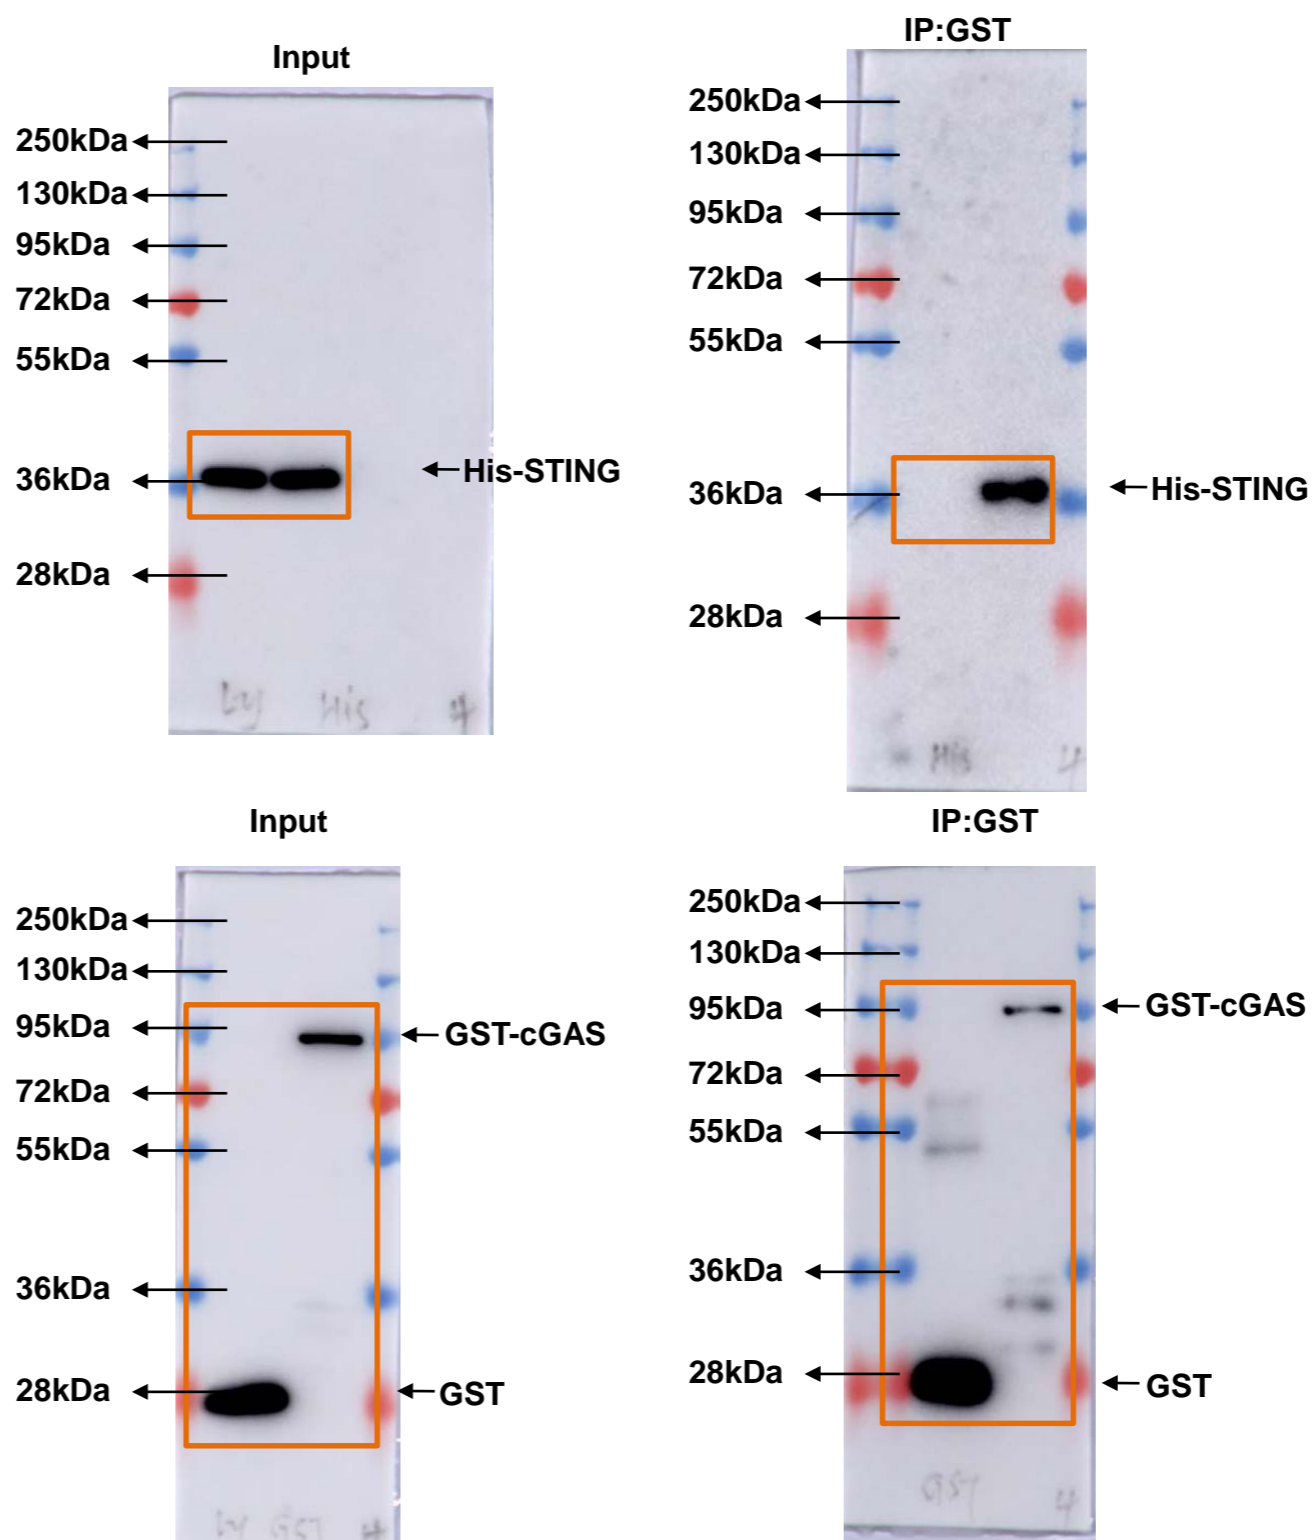

Figure 7F

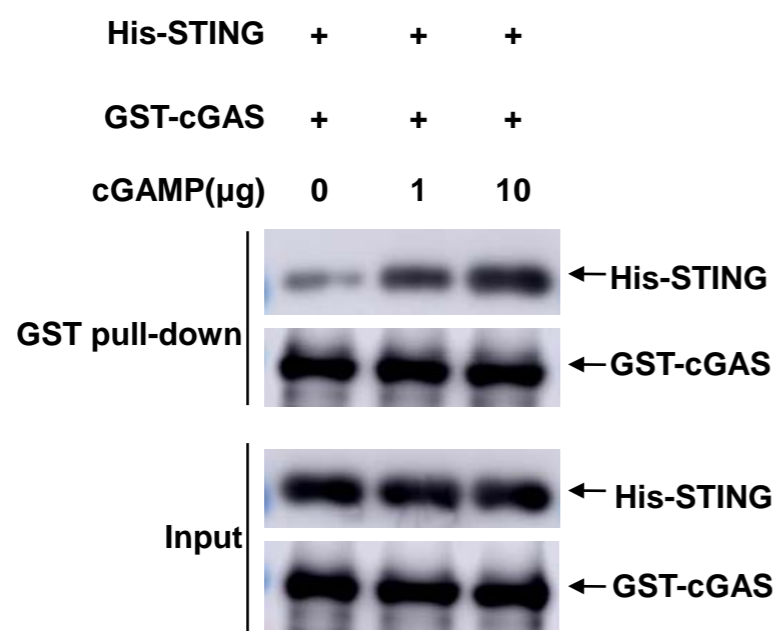

Figure 7F Source Data

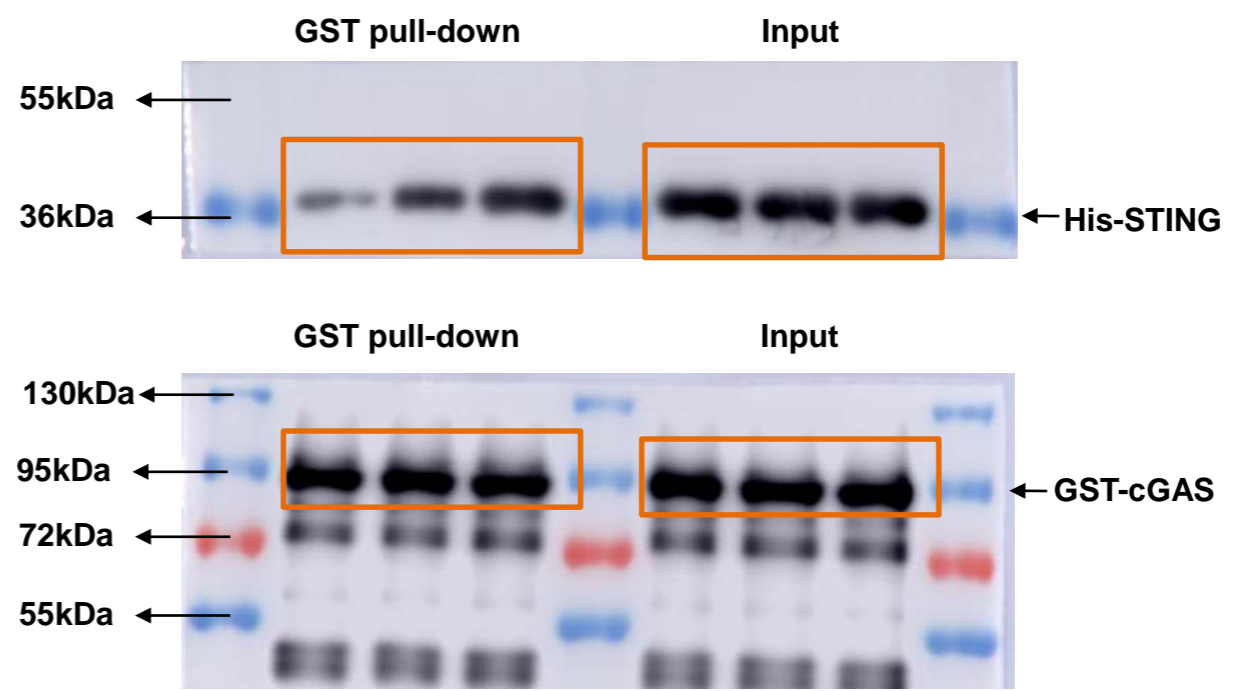

Figure 7G

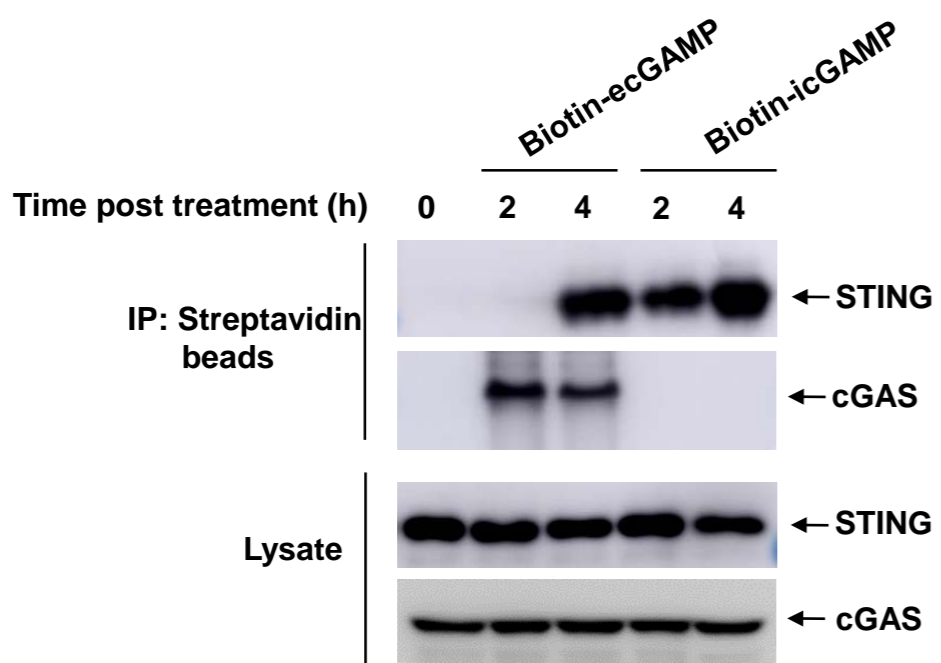

Figure 7G Source Data

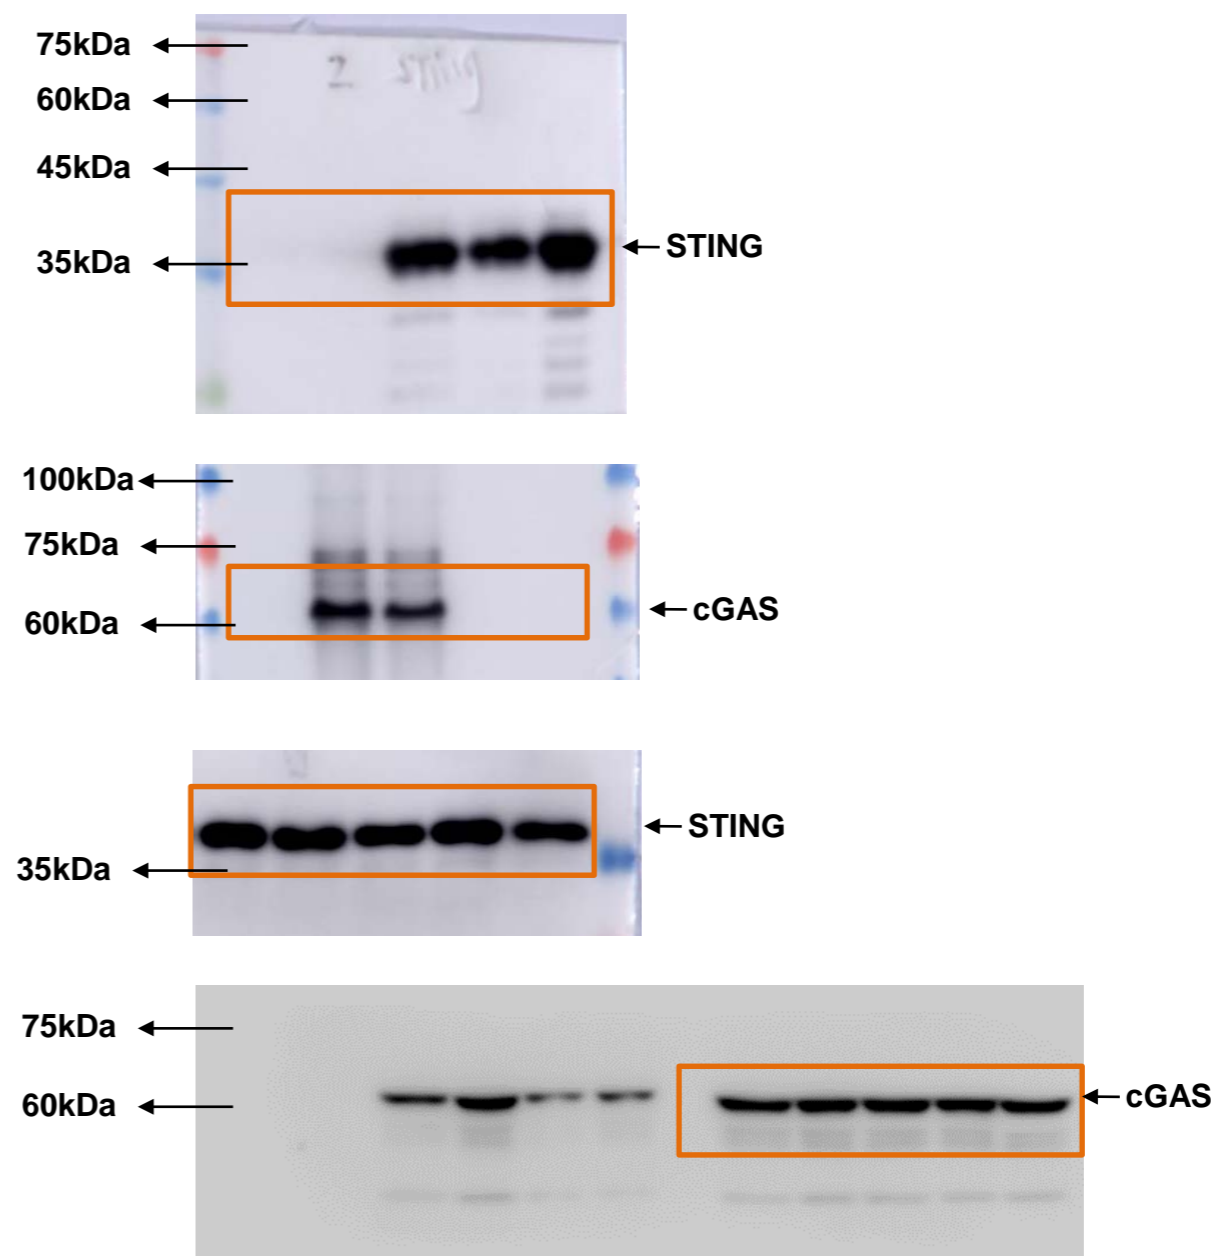

Supplement: EMBR-20-e46293-s006.pdf [file EMBR-20-e46293-s006.pdf]
