# Supplementary material
Source: PubMed Central journal article supplement (PMC6446192)

Figure 4F

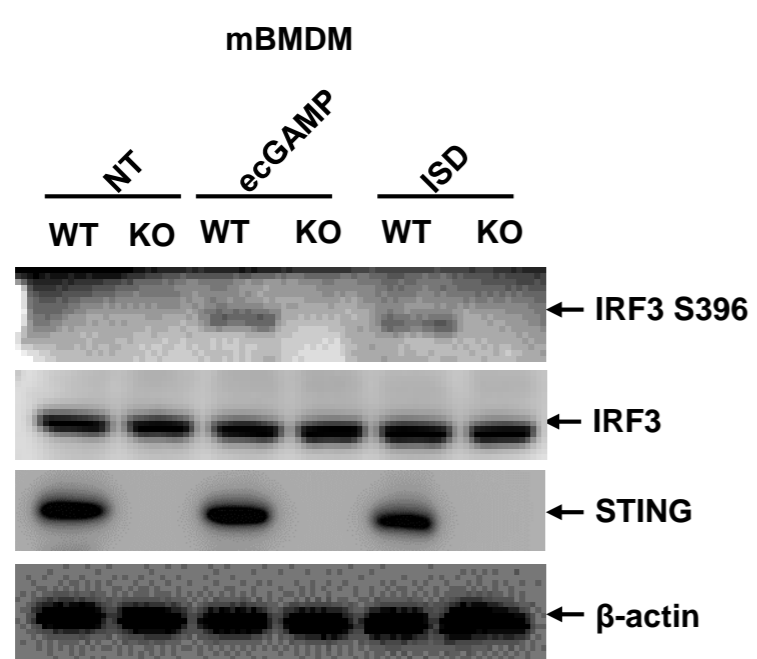

Figure 4F Source Data

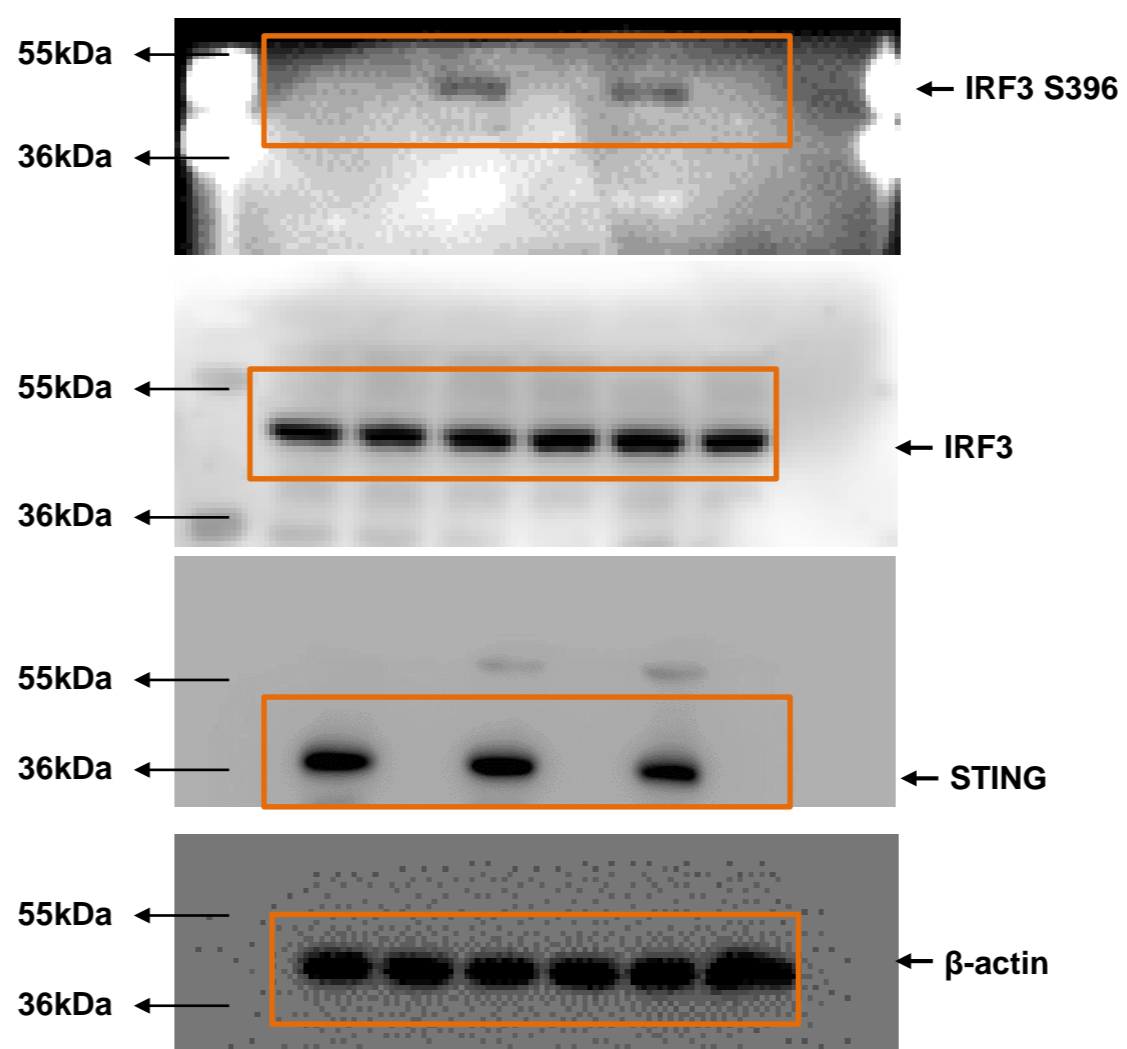

Figure 4H

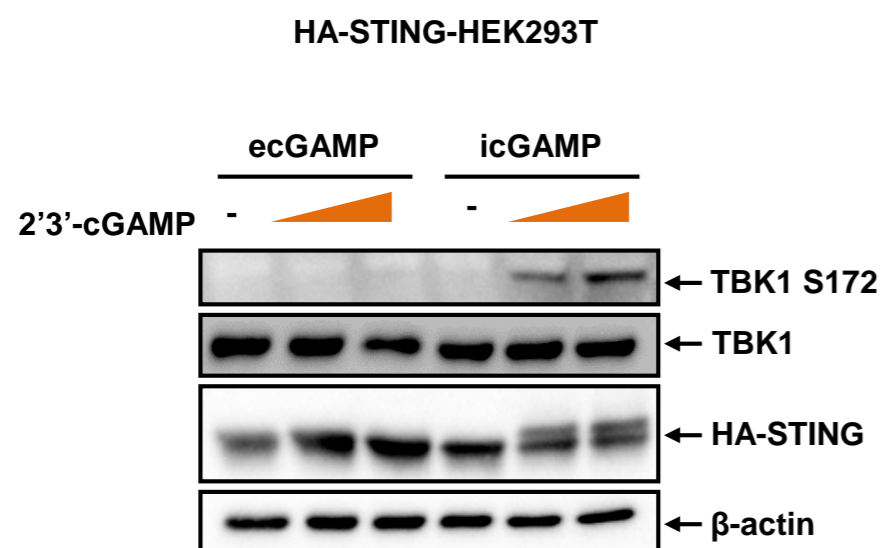

Figure 4H Source Data

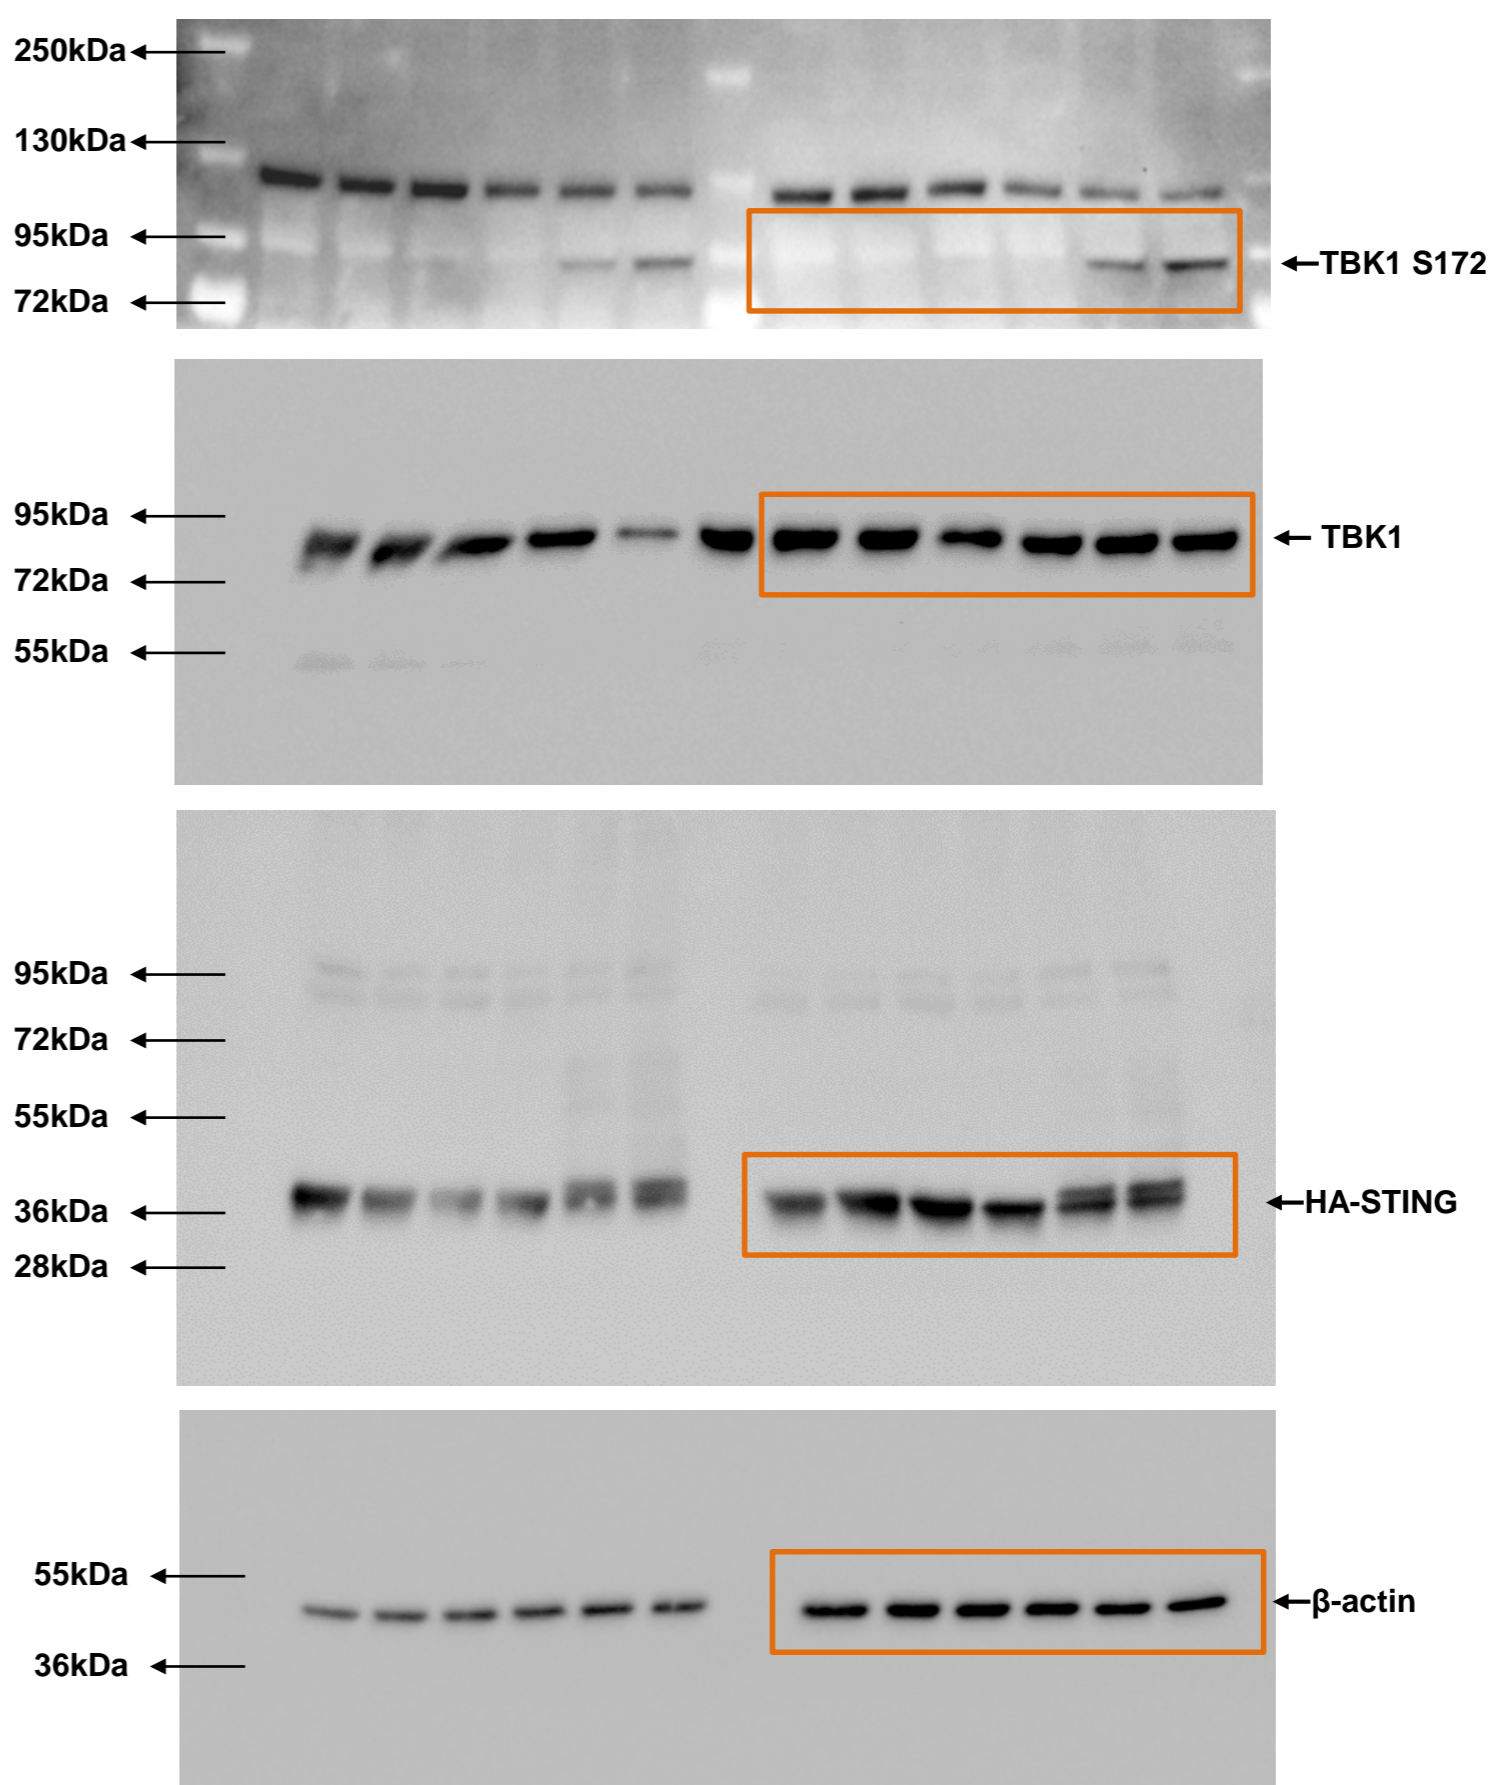

Supplement: EMBR-20-e46293-s003.pdf [file EMBR-20-e46293-s003.pdf]

Figure 5G

Figure 5G Source Data

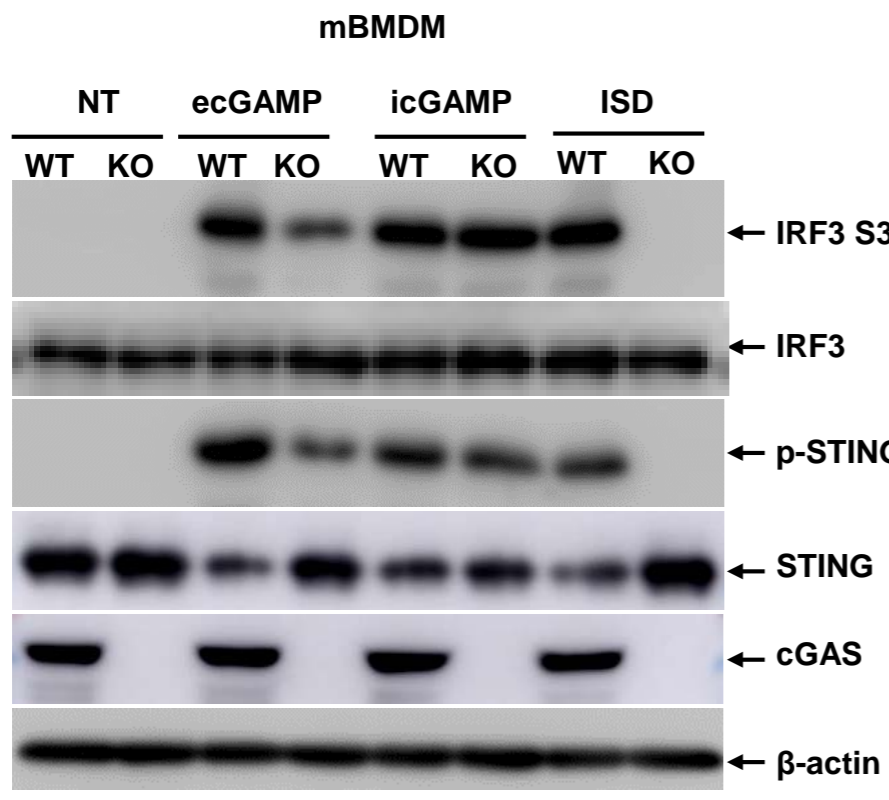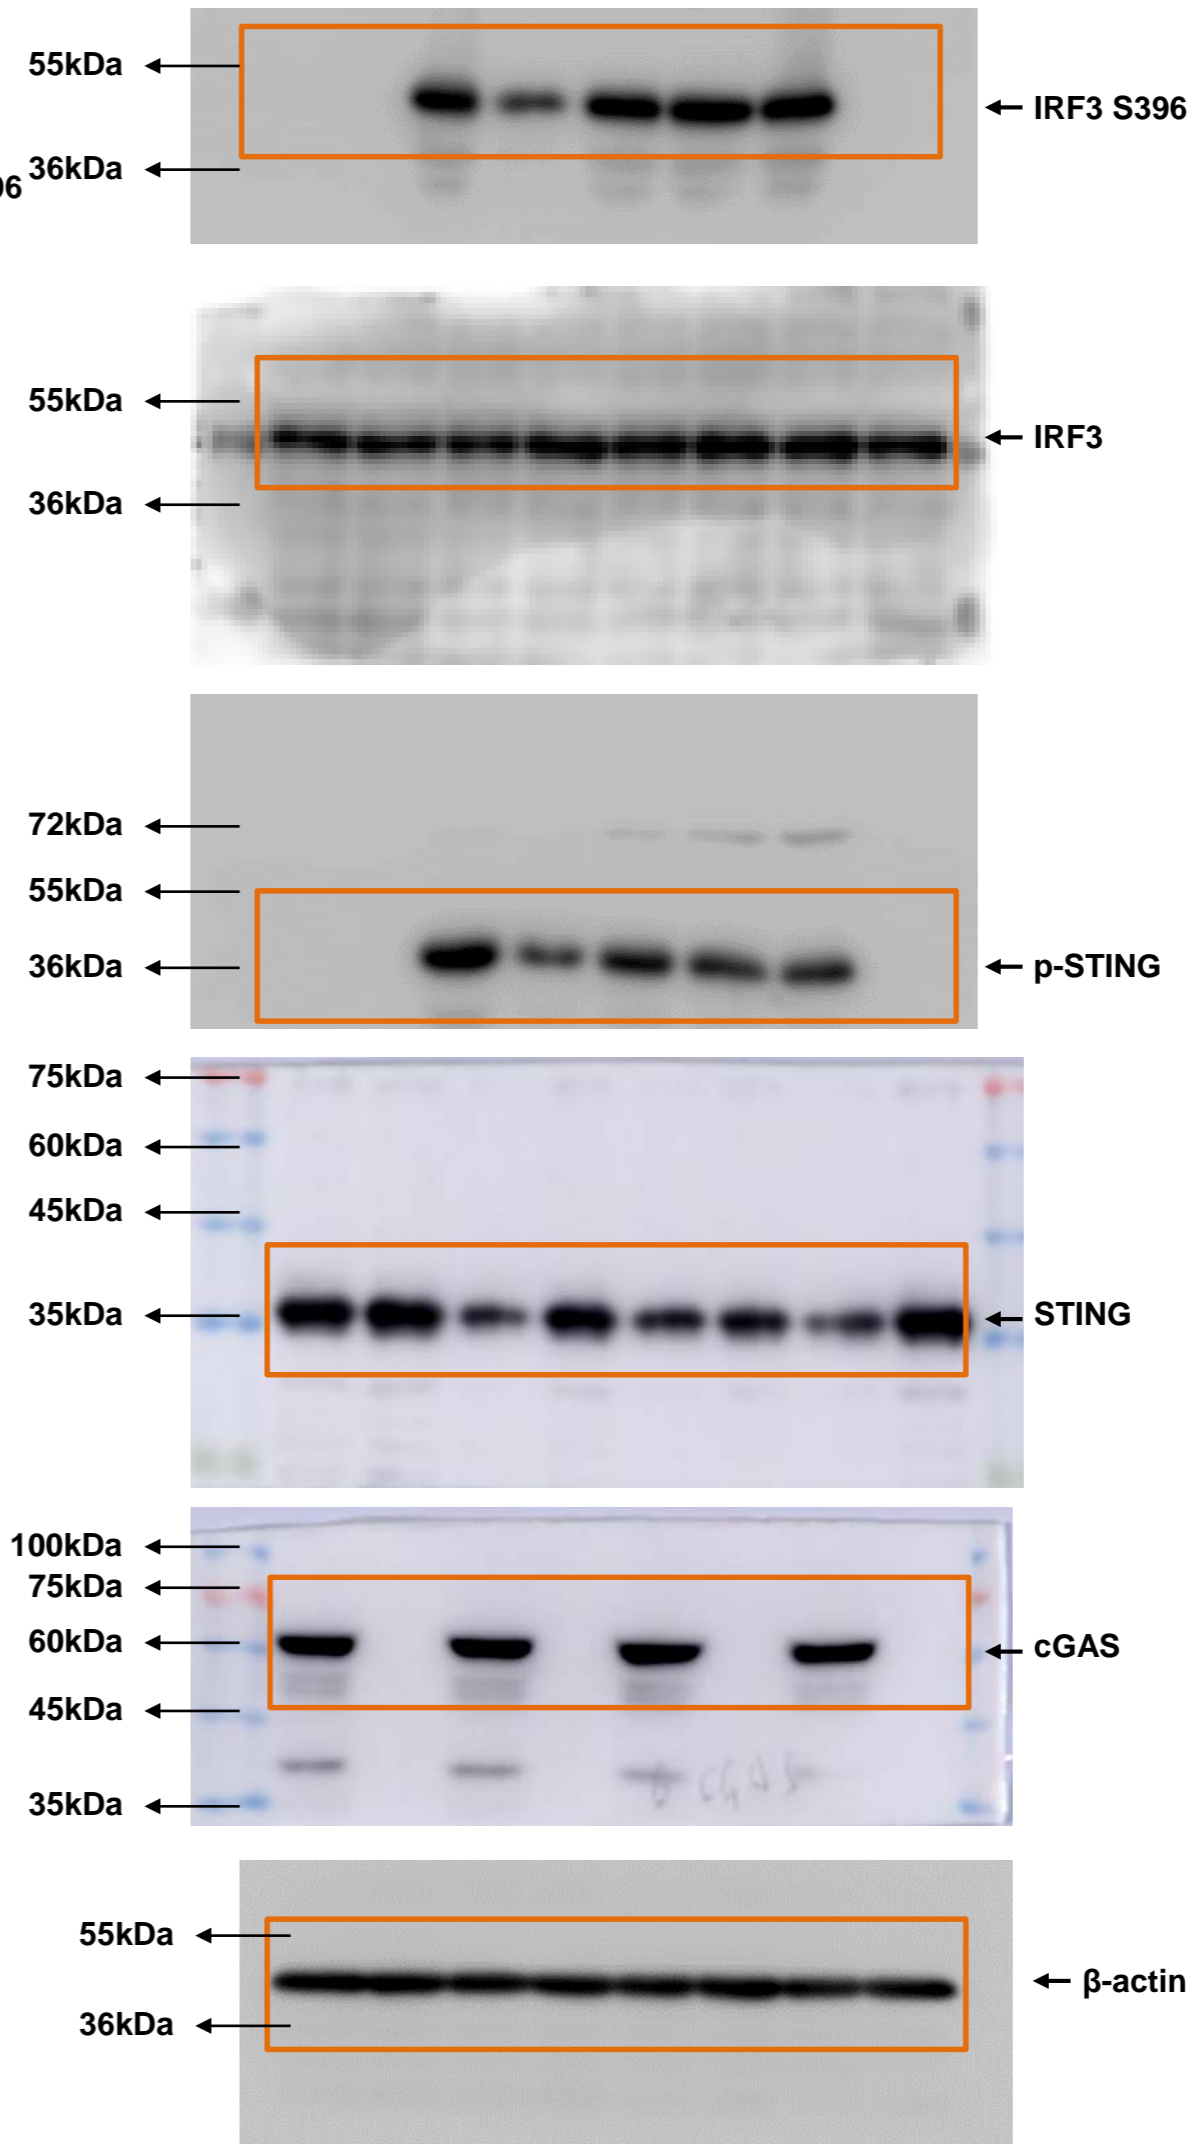

Supplement: EMBR-20-e46293-s004.pdf [file EMBR-20-e46293-s004.pdf]

Figure 6A

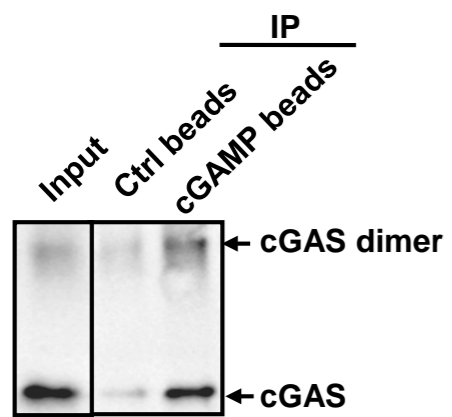

Figure 6A Source Data

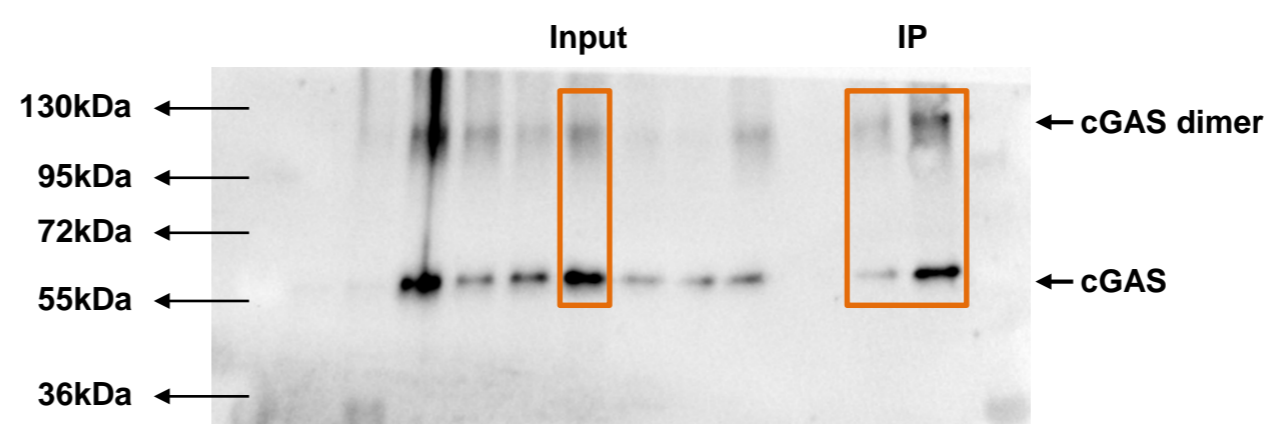

Figure 6B

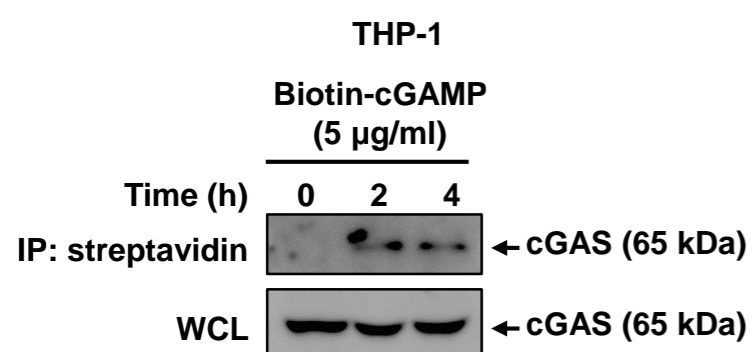

Figure 6B Source Data

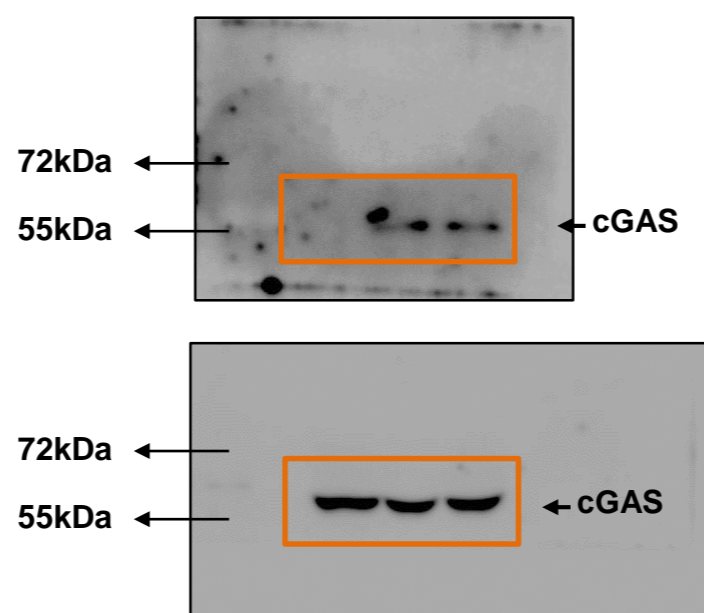

Figure 6D

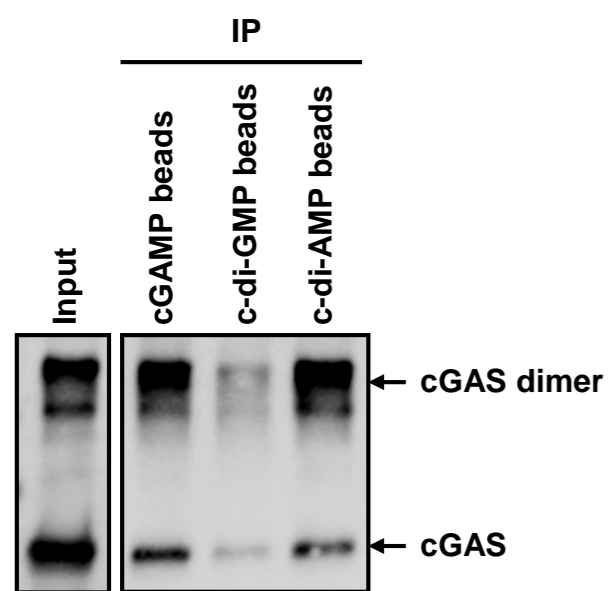

Figure 6D Source Data

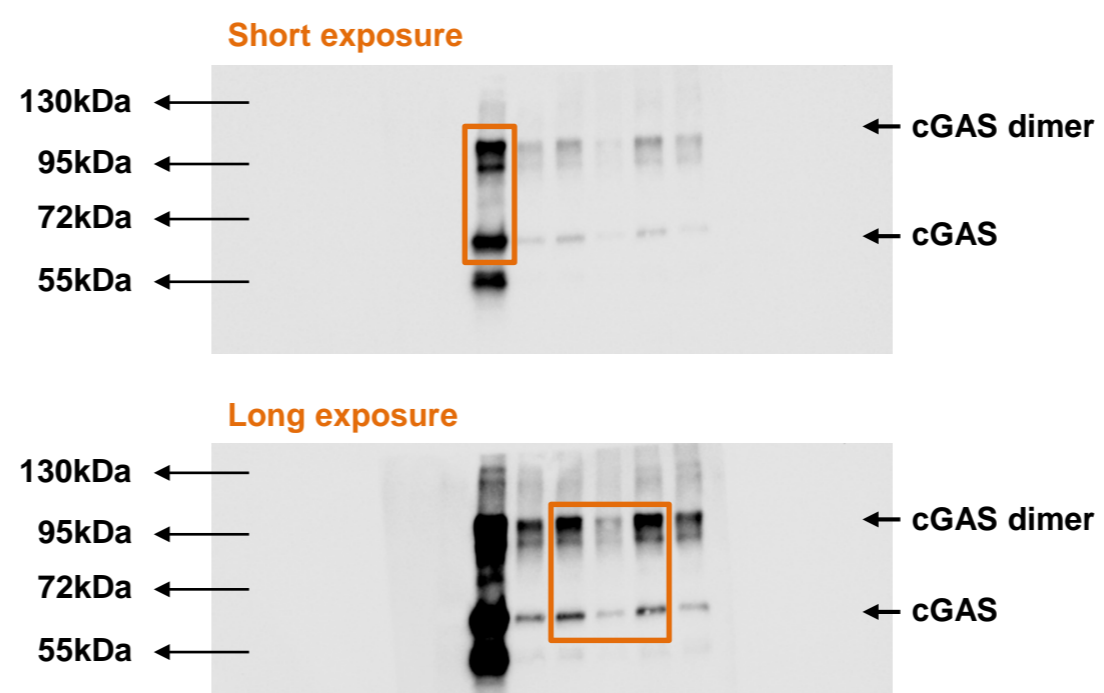

Supplement: EMBR-20-e46293-s005.pdf [file EMBR-20-e46293-s005.pdf]

Figure 8C

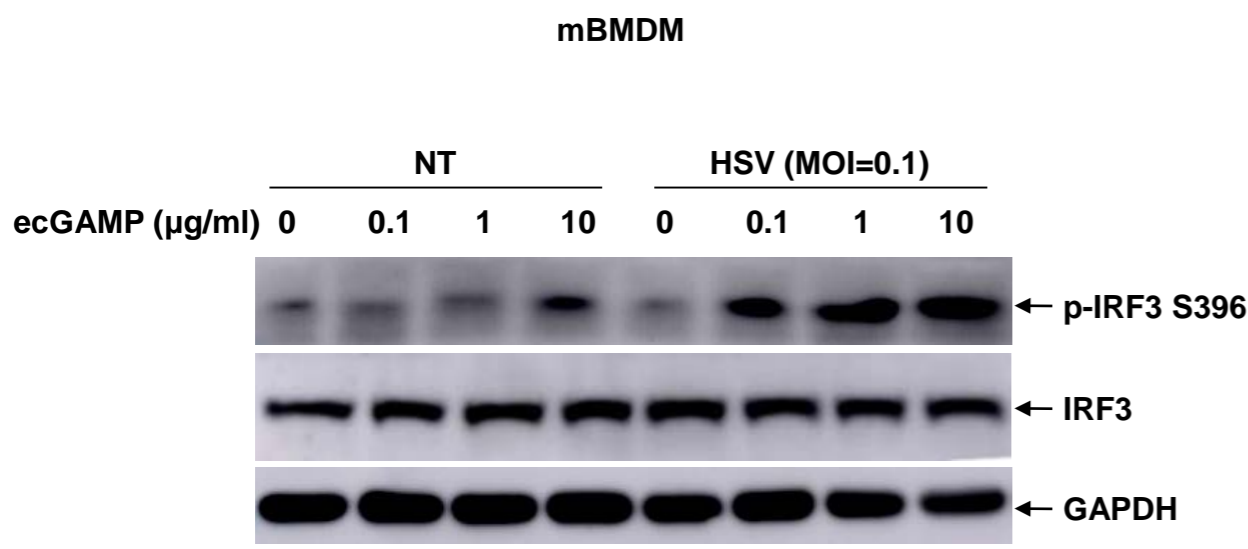

Figure 8F Source Data

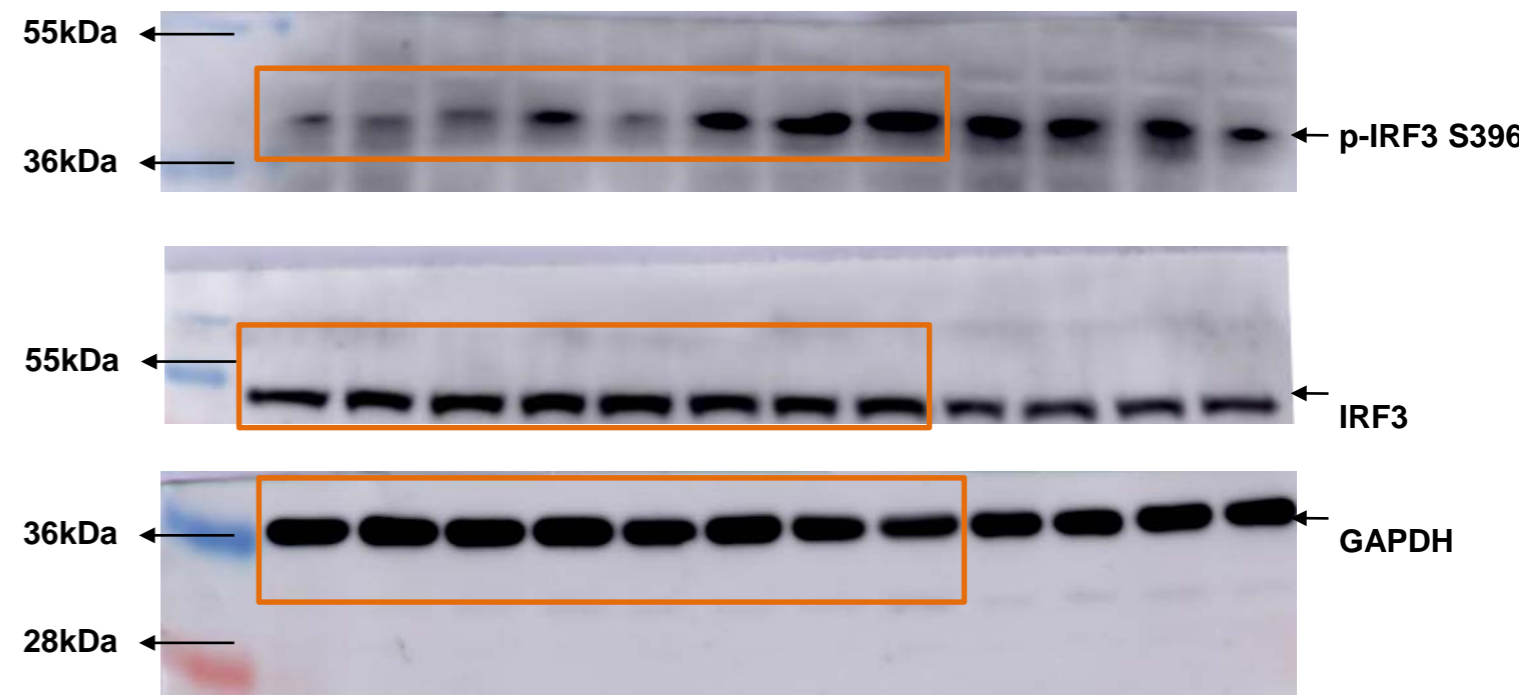

Supplement: EMBR-20-e46293-s007.pdf [file EMBR-20-e46293-s007.pdf]
